# Supplementary material for: A Systematic Literature Review with Meta – Analysis of Predictive Modelling of Rift Valley Fever Outbreaks in East Africa: Machine Learning and Time Series Approaches
Source: Preprints.org preprint supplement (doi:10.20944/preprints202409.1014.v1), 2024-09-14
Supplement: Supplementary file 1 [file supplementary]

## Sheet: filter 2 publications
S/N	First Author Last Name	Title of paper	Journal or publisher	Volume:page numbers	Year of publication	DOI	Language of publication	Publication status
1	Alrajhi	Rift Valley fever encephalitis	Emerg Infect Dis.	10(3):554-555	2004		English	Journal article
2	Elfadil	Epidemiologic study on Rift Valley fever in the Southwest of Kingdom of Saudi Arabia	J Sci Tech	5:110–119	2004		English	Journal article
3	Ringot	Rift Valley Fever in Chad	Emerg Infect Dis.	Vol. 10, No. 5, 945-947	2004	10.3201/eid1005.030621.	English	Journal article
4	Al-Hazmi	Ocular complications of Rift Valley fever outbreak in Saudi Arabia	Ophthalmology	112(2):313-318	2005	10.1016/j.ophtha.2004.09.018	English	Journal article
5	Chevalier	Rift Valley Fever in SmallRuminants, Senegal, 2003	Emerg Infect Dis.	11(11): 1693-1700	2005	10.3201/eid1111.050193	English	Journal article
6	Diallo	Mosquito vectors of the 1998-1999 outbreak of Rift Valley Fever and other arboviruses (Bagaza, Sanar, Wesselsbron and West Nile) in Mauritania and Senegal.	Med Vet Entomol	19(2):119-126	2005	10.1111/j.0269-283X.2005.00564.x	English	Journal article
7	Madani	Alkhumra virus infection, a new viral hemorrhagic fever in Saudi Arabia	J Infect.	51(2):91-97	2005	10.1016/j.jinf.2004.11.012	English	Journal article
8	Marrama	Domestic transmission of Rift Valley Fever virus in Diawara (Senegal) in 1998.	Southeast Asian J Trop Med Public Health	36(6):1487-1495	2005		English	Journal article
9	Abdo-Salem	Descriptive and Spatial Epidemiology of Rift Valley Fever Outbreak in Yemen 2000–2001	Annals New York Academy of Sciences	1081: 240-242	2006	10.1196/annals.1373.028	English	Journal article
10	Arishi	Vertical transmission of fatal Rift Valley fever in a newborn.	Ann Trop Paediatr	26(3):251-253	2006	10.1179/146532806X120363	English	Journal article
11	Elfadil	Factors associated with Rift Valley fever in south-west Saudi Arabia	Rev Sci Tech	25(3): 1137-1145	2006		English	Journal article
12	Elfadil	The persistence of Rift Valley fever in the Jazan region of Saudi Arabia	Rev Sci Tech	25(3):1131-1136	2006		English	Journal article
13	LeBreton	Rift Valley fever in goats, Cameroon	Emerg Infect Dis.	12(4):702-703	2006	10.3201/eid1204.051428	English	Journal article
14	WHO	Outbreak news. Rift Valley fever, Sudan	Wkly Epidemiol Rec	82(46):401-402	2007		English	Report
15	WHO	Outbreak news: Rift Valley fever, Sudan--update	Wkly Epidemiol Rec	82(48):417-418	2007		English	Report
16	Faye	Rift Valley fever outbreak with East-Central African virus lineage in Mauritania, 2003	Emerg Infect Dis	Vol. 13, No. 7: 1016-1023	2007	10.3201/eid1307.061487	English	Journal article
17	Soumare	Screening for Rift Valley fever infection in northern Somalia: A GIS based survey method to overcome the lack of sampling frame	Veterinary Microbiology.	121(3-4):249-256	2007	10.1016/j.vetmic.2006.12.017	English	Journal article
18	(Anonymous)	Outbreak news. Rift Valley fever, Kenya.	Wkly Epidemiol Rec	82(3):17-18	2007		English	Report
19	(Anonymous)	Outbreak news. Rift Valley fever, United Republic of Tanzania.	Wkly Epidemiol Rec.	82(14):117-118	2007		English	Report
20	(Anonymous)	Outbreaks of Rift Valley fever in Kenya, Somalia and United Republic of Tanzania, December 2006-April 2007	Wkly Epidemiol Rec	82(20):169-178	2007		English	Report
21	(Anonymous)	Outbreaks of Rift Valley fever in Kenya, Somalia and United Republic of Tanzania, December 2006-April 2008	Wkly Epidemiol Rec	82(20):169-179	2007		English	Report
22	(Anonymous)	Outbreaks of Rift Valley fever in Kenya, Somalia and United Republic of Tanzania, December 2006-April 2009	Wkly Epidemiol Rec	82(20):169-180	2007		English	Report
23	(Anonymous)	Rift Valley fever outbreak--Kenya, November 2006-January 2007.	MMWR	56(4):73-76.	2007		English	Report
24	Adam	Case Report: Rift Valley Fever With VerticalTransmission in a Pregnant Sudanese Woman	Journal of Medical Virology	80:929-929	2008	10.1002/jmv.21132	English	Journal article
25	Evans	Prevalence of antibodies against Rift Valley fever virus in Kenyan wildlife.	Epidemiol. Infect.	136(9):1261-1269	2008	10.1017/S0950268807009806	English	Journal article
26	Tarimo	Occurrence of Rift Valley fever (RVF) in Dodoma Region, Tanznia and its management implications	Tanzania Journal of Forestry and Nature Conservation	78:111-123	2008		English	Journal article
27	Bird	Multiple virus lineages sharing recent common ancestry were associated with a Large Rift Valley fever outbreak among livestock in Kenya during 2006-2007	J Virol.	82(22):11152-11166	2008	10.1128/JVI.01519-08	English	Journal article
28	LaBeaud	Interepidemic Rift Valley fever virus seropositivity, northeastern Kenya	Emerg Infect Dis	14(8):1240-1246	2008	10.3201/eid1408.080082	English	Journal article
29	Oltmann	Fatal outcome of hepatitis A virus (HAV) infection in a traveler with incomplete HAV vaccination and evidence of Rift Valley Fever virus infection	J Clin Microbiol.	46(11):3850-3852	2008	10.1128/jcm.01102-08	English	Journal article
30	Youssef, H.M.;	Recent trends for diagnosis of Rift Valley Fever in animals and mosquitoes in Egypt with special reference to the carrier.	Global Veterinaria	2(1)	2008		English	Journal article
31	(Anonymous)	Outbreak news. Rift Valley fever, Madagascar	Wkly Epidemiol Rec.	83(18):157	2008		English	Report
32	El Imam	Acute renal failure associated with the Rift Valley fever: a single center study	Saudi J Kidney Dis Transpl	20(6):1047-1052	2009		English	Journal article
33	Swai	Prevalence of Rift Valley fever immunoglobulin G antibody in various occupational groups before the 2007 outbreak in Tanzania	Vector Borne Zoonotic Dis	9(6):579-582	2009	10.1089/vbz.2008.0108	English	Journal article
34	Jansen van Vuren	Rift Valley Fever Reemergence after 7 Years of Quiescence, South Africa, May 2018	Emerg Infect Dis	Vol. 25, No. 2, 338-341	2009	https://doi.org/10.3201/eid2502.181289	English	Journal article
35	Chevalier	Endemic Transmission of Rift Valley Fever in Senegal	Transbound Emerg Dis.	56: 372-374	2009	doi:10.1111/j.1865-1682.2009.01083.x	English	Journal article
36	Sissoko	Rift Valley fever, Mayotte, 2007-2008	Emerg Infect Dis	15(4):568-570	2009	10.3201/eid1504.081045	English	Journal article
37	Anyangu	Risk Factors for Severe Rift Valley Fever Infection in Kenya, 2007	Am. J. Trop. Med. Hyg	83:14-21	2010	doi:10.4269/ajtmh.2010.09-0293	English	Journal article
38	Adam	Manifestations of severe Rift Valley fever in Sudan	Int J Infect Dis	14:e179-e180	2010	:10.1016/j.ijid.2009.03.029	English	Journal article
39	Al-Qabati	Cross-Sectional, Longitudinal and Prospective Epidemiological Studies of Rift Valley Fever in Al-Hasa Oasis, Saudi Arabia	Journal of Animal and Veterinary Advances	9(2):258-265	2010		English	Journal article
40	Kariithi	Sero-surveillance of Rift Valley fever in sheep and goat flocks in high risk areas in Kenya	The Kenya Veterinarian	34:13-19	2010		English	Journal article
41	Andriamandimby	Rift Valley fever during rainy seasons, Madagascar, 2008 and 2009.	Emerg Infect Dis	16(6):963-97	2010	10.3201/eid1606.091266	English	Journal article
42	Abdelgadir	Risk Factor Analysis for Outbreak of Rift Valley Fever in Khartoum State of Sudan	Journal of Entomological Science	Vol. 45, No. 3. 239-251	2010	10.18474/0749-8004-45.3.239.	English	Journal article
43	Sang	Rift Valley fever virus epidemic in Kenya, 2006-2007 the entomologic investigations	Am J Trop Med Hyg	83(Suppl 2), pp. 28–37	2010	10.4269/ajtmh.2010.09-0319	English	Journal article
44	Hassanain	Rift Valley fever among febrile patients at New Halfa hospital, eastern Sudan	Virology Journal	7:97	2010	10.1186/1743-422X-7-97	English	Journal article
45	Kahlon	Severe Rift Valley fever may present with a characteristic clinical syndrome	Am J Trop Med Hyg.	82(3):371-375	2010	10.4269/ajtmh.2010.09-0669	English	Journal article
46	Seufi	Role of Culex and Anopheles mosquito species as potential vectors of rift valley fever virus in Sudan outbreak, 2007	BMC Infect Dis	10:65	2010	10.1186/1471-2334-10-65	English	Journal article
47	Rostal	Identification of potential vectors of and detection of antibodies against Rift Valley fever virus in livestock during interepizootic periods	AJVR	71(5):522-526	2010	10.2460/ajvr.71.5.522	English	Journal article
48	Pourrut	Rift Valley Fever Virus Seroprevalence in Human Rural Populations of Gabon	PLoS Negl Trop Dis.	4(7):e763.	2010	. doi:10.1371/journal.pntd.0000763	English	Journal article
49	Rich	An assessment of the regional and national socio-economic impacts of the 2007 Rift Valley fever outbreak in Kenya	Am J Trop Med Hyg	83(2 Suppl):52-57	2010	10.4269/ajtmh.2010.09-0291	English	Journal article
50	Nguku	An investigation of a major outbreak of Rift Valley fever in Kenya 2006-2007	Am J Trop Med Hyg	83 (Suppl 2), pp. 5–13	2010	doi:10.4269/ajtmh.2010.09-0288	English	Journal article
51	Mohamed M,	Epidemiologic and clinical aspects of a Rift Valley fever outbreak in humans in Tanzania, 2007	Am J Trop Med Hyg.	83(2 Suppl):22-27	2010	10.4269/ajtmh.2010.09-0318	English	Journal article
52	Munyua	Rift Valley Fever Outbreak in Livestock in Kenya, 2006–2007	Am. J. Trop. Med. Hyg.	83(2 Suppl):58-64	2010	doi:10.4269/ajtmh.2010.09-0292	English	Journal article
53	(Anonymous)	Rift Valley fever, South Africa	Wkly Epidemiol Rec	85(20):177-178	2010		English	Report
54	(Anonymous)	Rift Valley fever, South Africa - update.	Wkly Epidemiol Rec	85(21):185-186	2010		English	Report
55	Ayari-Fakhfakh	First serological investigation of peste-des-petits-ruminants and Rift Valley fever in Tunisia	The Veterinary Journal	187:402-404	2011	doi:10.1016/j.tvjl.2010.01.007	English	Journal article
56	Archer	Outbreak of Rift Valley fever affecting veterinarians and farmers in South Africa, 2008	S Afr Med J	101(4):263-266	2011	10.7196/samj.4544	English	Journal article
57	LaBeaud	Rift Valley Fever Virus Infection in African Buffalo (Syncerus caffer) Herds in Rural South Africa: Evidence of Interepidemic Transmission	Am. J. Trop. Med. Hyg.	84(4):641-646.	2011		English	Journal article
58	LaBeaud	Postepidemic Analysis of Rift Valley Fever VirusTransmission in Northeastern Kenya: A Village Cohort Study	PLoS Negl Trop Dis.	5(8):1-9	2011	doi:10.1371/journal.pntd.0001265	English	Journal article
59	Chevalier	An unexpected recurrent transmission of Rift Valley fever virus in cattle in a temperate and mountainous area of Madagascar.	PLoS Negl Trop Dis	5(12):e1423	2011	10.1371/journal.pntd.0001423	English	Journal article
60	El-Harrak	Rift Valley and West Nile Virus Antibodies in Camels, North Africa	Emerg Infect Dis.	17(12): 2372-2374	2011	10.3201/eid1712.110587	English	Journal article
61	Ould El Mamy	Unexpected Rift Valley Fever Outbreak, Northern Mauritania	Emerg Infect Dis.	17(10):1894-1896	2011	10.3201/eid1710.110397	English	Journal article
62	Hanafi	Virus isolations and high population density implicate Culex antennatus (Becker) (Diptera: Culicidae) as a vector of Rift Valley Fever virus during an outbreak in the Nile Delta of Egypt	Acta Trop.	119(2-3):119-124	2011	10.1016/j.actatropica.2011.04.018	English	Journal article
63	Mohamed	Serological survey of Rift valley fever among sacrifice animals in holy mecca during pilgrimage season	International Journal of Tropical Medicine	6(4):85-89	2011		English	Journal article
64	Jeanmaire	Prevalence of Rift Valley fever infection in ruminants in Madagascar after the 2008 outbreak.	Vector Borne Zoonotic Dis	11(4):395-402	2011	10.1089/vbz.2009.0249	English	Journal article
65	Mease	Seroprevalence and distribution of arboviral infections among rural Kenyan adults: A cross-sectional study	Virology Journal	8:371	2011	http://www.virologyj.com/content/8/1/371	English	Journal article
66	Roger	Rift Valley Fever in Ruminants, Republic of Comoros, 2009	Emerg Infect Dis.	17(7): 1319-1320	2011	10.3201/eid1707.10203	English	Journal article
67	Memish	Seroprevalence of Alkhurma and Other Hemorrhagic Fever Viruses, Saudi Arabia	Emerg Infect Dis.	Vol. 17, No. 12, 2316-2318	2011	http://dx.doi.org/10.3201/eid1712.110658	English	Journal article
68	Ratovonjato	Detection, isolation, and genetic characterization of Rift Valley fever virus from Anopheles (Anopheles) coustani, Anopheles (Anopheles) squamosus, and Culex (Culex) antennatus of the Haute Matsiatra region, Madagascar.	Vector Borne Zoonotic Dis	11(6):753-759	2011	10.1089/vbz.2010.0031	English	Journal article
69	Rakotoarivelo	Severe presentations of Rift Valley Fever in Madagascar [in French]	Med Mal Infect	41(6):318-321	2011	10.1016/j.medmal.2010.12.007.	French	Journal article
70	Miller M	Serosurvey for selected viral agents in white rhinoceros (Ceratotherium simum) in Kruger National Park, 2007	J Zoo Wildl Med	42(1):29-32	2011	10.1638/2009-0176.1	English	Journal article
71	Nderitu	Sequential Rift Valley Fever Outbreaks in Eastern Africa Caused by Multiple Lineages of the Virus	Journal of Infectious Diseases	203: 655-665	2011	DOI: 10.1093/infdis/jiq004	English	Journal article
72	Elsheikh	Seroprevalence of 2 zoonotic diseases in Southwestern Saudi Arabia. Rift Valley fever and brucellosis	Saudi Med J.	32(7):740-741	2011		English	Journal article
73	Al-Afaleq	Seroepidemiological study of Rift Valley fever (RVF) in animals in Saudi Arabia	Trop Anim Health Prod	44(7):1535-1539	2012	10.1007/s11250-012-0100-x	English	Journal article
74	Al-Azraqi	Rift Valley Fever in Southwestern Saudi Arabia: a sero-epidemiological study seven years after the outbreak of 2000-2001	Acta Trop	123(2):111-116	2012	10.1016/j.actatropica.2012.04.007	English	Journal article
75	Ba	Re-Emergence of Rift Valley Fever Virus in Barkedji (Senegal, West Africa) in 2002–2003: Identification of New Vectors and Epidemiological Implications	J Am Mosq Control Assoc	28:170-178	2012	https://doi.org/10.2987/12-5725.1	English	Journal article
76	Heinrich	High Seroprevalence of Rift Valley Fever and Evidence for Endemic Circulation in Mbeya Region, Tanzania, in a Cross-Sectional Study	PLoS Negl Trop Dis.	6(3): e1557	2012	doi:10.1371/journal.pntd.0001557	English	Journal article
77	Schwarz	Seroprevalence of Antibodies against Chikungunya, Dengue, and Rift Valley Fever Viruses after Febrile Illness Outbreak, Madagascar	Emerg Infect Dis.	18:1781-1786	2012	http://dx.org/10.3201/eid1811.111036	English	Journal article
78	Cêtre-Sossah	Genome analysis of Rift Valley fever virus, Mayotte	Emerg Infect Dis.	18(6):969-971	2012	10.3201/eid1806.110994	English	Journal article
79	Cetre-Sossah	Prevalence of Rift Valley Fever among Ruminants, Mayotte	Emerg Infect Dis.	18(6):972-975	2012	10.3201/eid1806.111165	English	Journal article
80	Muhsen	Seroepidemiology of Rift Valley fever in Basrah	Kufa J Vet Med Sci	3(2): 91–5	2012		English	Journal article
81	Mapaco	An investigation into an outbreak of Rift Valley fever on a cattle farm in Bela-Bela, South Africa, in 2008	J S Afr Vet Assoc	83(1):132	2012	10.4102/jsava.v83i1.132	English	Journal article
82	(Anonymous)	Outbreak news. Rift Valley fever, Mauritania	Wkly Epidemiol Rec	87(45):438	2012		English	Report
83	Al Azraqi	Rift Valley fever among children and adolescents in southwestern Saudi Arabia	journal of Infection and Public Health	6:230-235	2013	http://dx.doi.org/10.1016/j.jiph.2012.11.011	English	Journal article
84	Albayrak	Seroepidemiological Study of West Nile Virus and Rift Valley Fever Virus in Some of Mammalian Species (Herbivores) in Northern Turkey	Journal of Arthropod-Borne Disease	7:90-93	2013	N/A	English	Journal article
85	Aradaib	Rift Valley fever, Sudan, 2007 and 2010	Emerg Infect Dis	19(2):246-253	2013	10.3201/eid1902.120834	English	Journal article
86	Archer	Epidemiologic Investigations into Outbreaks of Rift Valley Fever in Humans, South Africa, 2008-2011	Emerg Infect Dis.	19(12):1918-1925	2013	10.3201/eid1912.121527	English	Journal article
87	Bonney	Hospital-based surveillance for viral hemorrhagic fevers and hepatitides in Ghana.	PLoS Negl Trop Dis	7(9):e2435	2013	10.1371/journal.pntd.0002435	English	Journal article
88	Boussini	A. Rift Valley fever in camels in northern Burkina Faso	Bull Anim Hlth Prod Afr.	61:467-472	2013		English	Journal article
89	Britch	Rift Valley fever risk map model and seroprevalence in selected wild ungulates and camels from Kenya	PLOS ONE	8(6):e66626	2013	10.1371/journal.pone.0066626	English	Journal article
90	Britch	Rift Valley fever risk map model and seroprevalence in selected wild ungulates and camels from Kenya	PLOS ONE	8(6):e66626	2013	10.1371/journal.pone.0066626	English	Journal article
91	Britch	Rift Valley fever risk map model and seroprevalence in selected wild ungulates and camels from Kenya	PLOS ONE	8(6):e66626	2013	10.1371/journal.pone.0066626	English	Journal article
92	Caron	Relationship between burden of infection in ungulate populations and wildlife/livestock interfaces	Epidemiol Infect.	141(7):1522-1535	2013	10.1017/s0950268813000204	English	Journal article
93	Chengula	Socio-economic impact of Rift Valley fever to pastoralists and agro pastoralists in Arusha, Manyara and Morogoro regions in Tanzania.	Springerplus	2:549	2013	10.1186/2193-1801-2-549	English	Journal article
94	Fafetine	Serological Evidence of Rift Valley Fever Virus Circulation in Sheep and Goats in Zambezia Province, Mozambique.	PLoS Negl Trop Dis.	7(2).	2013	10.1371/journal.pntd.0002065	English	Journal article
95	Fafetine	Serological Evidence of Rift Valley Fever Virus Circulation in Sheep and Goats in Zambezia Province, Mozambique.	PLoS Negl Trop Dis.	7(2).	2013	10.1371/journal.pntd.0002066	English	Journal article
96	Fafetine	Serological Evidence of Rift Valley Fever Virus Circulation in Sheep and Goats in Zambezia Province, Mozambique.	PLoS Negl Trop Dis.	7(2).	2013	10.1371/journal.pntd.0002067	English	Journal article
97	Aghaa	Seroprevalence study of Rift Valley fever antibody in sheep and goats in Ninevah governorate	Iraqi J Vet Sci	27(2): 54–61	2013		Arabic	Journal article
98	Chinikar	Surveillance of Rift Valley fever in Iran between 2001 and 2011	All Res J Biol	4(2): 16–8	2013		English	Journal article
99	Korok	Sero-prevalence of Rift Valley Fever (RVF) in Sheep and Goats in Greater Kapoeta Eastern Equatoria State South Sudan	Nature and Science	11 (1): 29-30	2013		English	Journal article
100	Jori	An assessment of Zoonotic and Production Limiting Pathogens in Rusa Deer (Cervus timorensis rusa) from Mauritius	Transbound Emerg Dis.	61(Suppl. 1) 31–42	2013	10.1111/tbed.12206	English	Journal article
101	Jackel	Molecular and serological studies on the Rift Valley fever outbreak in Mauritania in 2010	Transbound Emerg Dis.	60 Suppl 2:31-39	2013	10.1111/tbed.12142	English	Journal article
102	Lagerqvist	Antibodies against Rift Valley fever virus in cattle, Mozambique.	Emerg Infect Dis	Vol. 19, No. 7, 1177-1179	2013	http://dx.doi.org/eid1907.130332	English	Journal article
103	Sumaye	Inter-epidemic transmission of Rift Valley fever in livestock in the Kilombero River Valley, Tanzania: a cross-sectional survey.	PLoS Negl Trop Dis	7(8):e2356	2013	10.1371/journal.pntd.0002356	English	Journal article
104	Sindato	Spatial distribution of non-clinical Rift Valley fever viral activity in domestic and wild ruminants in northern Tanzania	Tanzania Veterinary Journal	28 (Special):21-38	2013		English	Journal article
105	Lernout	Rift valley fever in humans and animals in Mayotte, an endemic situation?	PLOS ONE	8(9):e74192	2013	10.1371/journal.pone.0074192	English	Journal article
106	Mentaberre	A transversal study on antibodies against selected pathogens in dromedary camels in the Canary Islands, Spain	Veterinary Microbiolgoy	167: 468-473	2013	http://dx.doi.org/10.1016/j.vetmic.2013.07.029	English	Journal article
107	Olive	Absence of Rift Valley Fever Virus in Wild Small Mammals, Madagascar	Emerg Infect Dis.	Vol. 19, No. 6, 1025-1027	2013	http://dx.doi.org/10.3201/eid1906.121074	English	Journal article
108	Monaco	Rift Valley Fever in Namibia, 2010	Emerg Infect Dis.	19	2013	DOI: http://dx.doi.org/10.3201/eid1912.130593	English	Journal article
109	Magona	Rift Valley fever in Uganda: Seroprevalence and risk factor surveillance vis-a-vis mosquito vectors, anti-RVF virus IgG and RVF virus neutralizing antibodies in goats	Small Ruminant Research	114(1):176-181	2013	10.1016/j.smallrumres.2013.05.008	English	Journal article
110	Nicolas	Description and analysis of the cattle trade network in the Madagascar highlands: Potential role in the diffusion of Rift Valley fever virus	Acta Trop.	126	2013	http://dx.doi.org/10.1016/j.actatropica.2012.12.013	English	Journal article
111	Al-Azraqi	Seroprevalence of Rift Valley Fever among abattoirs workers in Southwestern Saudi Arabia.	Int J Infect Dis	16:e246.	2013		English	abstract
112	Abakar	Seroprevalence of Rift Valley Fever, Q Fever, and Brucellosis in Ruminants on the Southeastern Shore of Lake Chad	Vector Borne Zoonotic Dis.	14:757-762	2014	10.1089/vbz.2014.1585	English	Journal article
113	Andayi	A Sero-epidemiological Study of Arboviral Fevers in Djibouti, Horn of Africa	PLoS Negl Trop Dis.	8:e3299	2014	10.1371/journal.pntd.0003299	English	Journal article
114	Weller	Seroprevalence of Alphavirus Antibodies in a Cross-Sectional Study in Southwestern Tanzania SuggestsEndemic Circulation of Chikungunya	PLoS Negl Trop Dis.	8(7): e2979	2014	doi:10.1371/journal.pntd.0002979	English	Journal article
115	Sow	Rift Valley Fever Outbreak, Southern Mauritania, 2012	Emerg Infect Dis.	20(2): 296-299	2014	DOI: http://dx.doi.org/10.3201/eid2002.131000	English	Journal article
116	Schoepp	Undiagnosed Acute Viral Febrile Illnesses, Sierra Leone	Emerg Infect Dis.	20:1176-1182	2014	http://dx.doi.org/10.3201/eid2007.13126	English	Journal article
117	Boussini	Prevalence of Rift Valley fever in domestic ruminants in the central and northern regions of Burkina Faso	Revue Scientifique Et Technique-Office International Des Epizooties	33(3):893-901	2014	10.20506/rst.33.3.2327	English	Journal article
118	Bukbuk	Development and validation of serological assays for viral hemorrhagic fevers and determination of the prevalence of Rift Valley fever in Borno State, Nigeria	Trans R Soc Trop Med Hyg	108(12):768-773	2014	10.1093/trstmh/tru163	English	Journal article
119	Di Nardo	Evidence of rift valley fever seroprevalence in the Sahrawi semi-nomadic pastoralist system,Western Sahara	BMC Vet Res	10(92):1-9	2014	http://www.biomedcentral.com/1746-6148/10/92	English	Journal article
120	Chengula	Molecular detection of Rift Valley fever virus in serum samples from selected areas of Tanzania	Trop Anim Health Prod	46(4):629-634	2014	10.1007/s11250-014-0540-6	English	Journal article
121	Elhassan	Risk factors of Rift Valley fever in central Sudan	/ International Journal of Infectious Diseases	215	2014	10.1016/j.ijid.2014.03.457	English	abstract
122	Fagbo	Seroprevalence of Rift Valley fever and lumpy skin disease in African buffalo (Syncerus caffer) in the Kruger National Park and Hluhluwe-iMfolozi Park, South Africa	J S Afr Vet Assoc	85(1):e1-e7	2014	10.4102/jsava.v85i1.1075	English	Journal article
123	El Mamy	L’épidémie de la fièvre de la vallé du Rift en 2012 en Mauritanie	Revue Africaine de Santé et Productions Animales	12(3-4):169-173	2014		French	Journal article
124	Faye	Reemergence of Rift Valley fever, Mauritania, 2010	Emerg Infect Dis	Vol. 20, No. 2, 300-303	2014	http://dx.doi.org/10.3201/eid2002.130996	English	Journal article
125	Sow	Rift Valley fever in Kedougou, southeastern Senegal, 2012	Emerg Infect Dis	Vol. 20, No. 3, 504-6	2014	http://dx.doi.org/10.3201/eid2003.131174	English	Journal article
126	Horton	Serosurvey for Zoonotic Viral and Bacterial PathogensAmong Slaughtered Livestock in Egypt	Vector Borne Zoonotic Dis.	14(9):633-639	2014	10.1089/vbz.2013.1525	English	Journal article
127	Abbas	Animal health constraints to livestock exports from the Horn of Africa.	Rev Sci Tech	33(3): 711-21	2014		English	Journal article
128	Lesko	Sero-epidemiological findings of zoonotic infections in Maputo suburban residents	Poster presentation: 16thICID Abstracts / International Journal of Infectious Diseases 21S (2014) 1–460		2014	http://dx.doi.org/10.1016/j.ijid.2014.03.903	English	abstract
129	Kifaro	Epidemiological study of Rift Valley fever virus in Kigoma, Tanzania	Onderstepoort J Vet Res	81(2)	2014	http://dx.doi.org/10.4102/ojvr.v81i2.717	English	Journal article
130	Lutomiah	Blood Meal Analysis and Virus Detection in Blood-Fed Mosquitoes Collected During the 2006–2007 Rift Valley Fever Outbreak in Kenya	Vector Borne Zoonotic Dis.	Volume 14, Number 9, p656-664	2014	10.1089/vbz.2013.1564	English	Journal article
131	Lichoti	Detection of Rift Valley Fever Virus Interepidemic Activity in Some Hotspot Areas of Kenya by Sentinel AnimalSurveillance, 2009–2012	Veterinary Medicine International	2014:379010.	2014	http://dx.doi.org/10.1155/2014/379010	English	Journal article
132	Sindato	Spatial and temporal pattern of Rift Valley fever outbreaks in Tanzania; 1930 to 2007	PLOS ONE	9(2):e88897	2014	10.1371/journal.pone.0088897	English	Journal article
133	Roger	Evidence for Circulation of the Rift Valley Fever Virus among Livestock in the Union of Comoros	PLoS Negl Trop Dis	8(7)	2014	doi:10.1371/journal.pntd.0003045	English	Journal article
134	Mohamed AM	Seroepidemiological survey on Rift Valley fever among small ruminants and their close human contacts in Makkah, Saudi Arabia, in 2011	Rev Sci Tech	33(3):903-915	2014	10.20506/rst.33.3.2328	English	Journal article
135	Nicolas	Short Report: A 3-Year Serological and Virological Cattle Follow-Up in Madagascar Highlands Suggests a Non-Classical Transmission Route of Rift Valley Fever Virus	Am. J. Trop. Med. Hyg	90(2):265-266	2014	doi:10.4269/ajtmh.13-0538	English	Short Report
136	Owange	Occurrence of rift valley fever in cattle in Ijara district, Kenya.	Prev Vet Med	117(1):121-128	2014	10.1016/j.prevetmed.2014.08.008	English	Journal article
137	Al-Hamdan	The Risk of Nosocomial Transmission of Rift Valley Fever	PLoS Negl Trop Dis	9(12): e0004314	2015	10.1371/journal.pntd.0004314	English	Journal article
138	Mhina	Rift Valley fever potential mosquito vectors and their infection status in Ngorongoro District in northern Tanzania	Tanzan J Health Res	17(4):1-9	2015	http://dx.doi.org/10.4314/thrb.v17i4.3	English	Journal article
139	Tigoi	Seroepidemiology of Selected Arboviruses in Febrile Patients Visiting Selected Health Facilities in the Lake/River Basin Areas of Lake Baringo, Lake Naivasha, and Tana River, Kenya	Vector Borne Zoonotic Dis.	15(2): 124-132	2015	DOI: 10.1089/vbz.2014.1686	English	Journal article
140	Wensman	A study of Rift Valley fever virus in Morogoro and Arusha regions of Tanzania - serology and farmers' perceptions.	Infect Ecol Epidemiol.	5:30025	2015	10.3402/iee.v5.30025.	English	Journal article
141	Beechler	Rift Valley Fever in Kruger National Park: Do Buffalo Play a Role in the Inter-Epidemic Circulation of Virus?	Transbound Emerg Dis.	62(1):24-32	2015	10.1111/tbed.12197	English	Journal article
142	Beechler	Enemies and turncoats: bovine tuberculosis exposes pathogenic potential of Rift Valley fever virus in a common host, African buffalo (Syncerus caffer)	Proc Biol Sci.	282(1805).	2015	10.1098/rspb.2014.2942	English	Journal article
143	Boshra	Seroprevalence of Sheep and Goat Pox, Peste Des Petits Ruminants and Rift Valley Fever in Saudi Arabia.	PLOS ONE	10(10):e0140328	2015	10.1371/journal.pone.0140328	English	Journal article
144	Elfving	Acute Uncomplicated Febrile Illness inChildren Aged 2-59 months in Zanzibar–Aetiologies, Antibiotic Treatment andOutcome	PLOS ONE	11(1):1-21	2015	10.1371/journal.pone.0146054	English	Journal article
145	Alhaj	Surveillance study on Rift Valley Fever in Jazan region, Saudi Arabia	Int J.Adv. Sci. Tech. Res	5(4) 1-13	2015		English	Journal article
146	Gray	Seroepidemiological Study of Interepidemic Rift Valley Fever Virus Infection Among Persons with Intense Ruminant Exposure in Madagascar and Kenya	Am J Trop Med Hyg	93(6):1364-1370	2015	10.4269/ajtmh.15-0383	English	Journal article
147	Swai	Seroprevalence of Rift Valley fever virus infection in camels (dromedaries) in northern Tanzania	Trop Anim Health Prod.	47(2):347-352	2015	10.1007/s11250-014-0726-y	English	Journal article
148	Sumaye	Inter-epidemic acquisition of Rift Valley fever virus in humans in Tanzania	PLoS Negl Trop Dis	9(2):e0003536	2015	10.1371/journal.pntd.0003536	English	Journal article
149	Sindato	A Spatial Analysis of Rift Valley Fever VirusSeropositivity in Domestic Ruminants inTanzania	PLoS ONE	10(7)	2015	10.1371/journal.pone.0131873	English	Journal article
150	Jori	Serological Evidence of Rift Valley Fever Virus Circulation in Domestic Cattle	Frontiers in Veterinary Science	2	2015	10.3389/fvets.2015.00063	English	Journal article
151	Kim	Serological surveillance studies confirm the Rift Valley fever virus free status in South Korea	Trop Anim Health Prod	47:1427-1430	2015	DOI 10.1007/s11250-015-0858-8	English	Journal article
152	Selim	Seroprevalence and Economic Impact of Rift Valley Fever Among Small Ruminants	Asian J. Anim. Vet. Adv.	10 (11): 781-788	2015	10.3923/ajava.2015.781.788	English	Journal article
153	Lwande	Spatio-temporal variation in prevalence of RiftValley fever: a post-epidemic serum survey incattle and wildlife in Kenya	Infect Ecol Epidemiol.	5:1	2015	https://doi.org/10.3402/iee.v5.30106	English	Journal article
154	LaBeaud	Factors Associated with Severe Human RiftValley Fever in Sangailu, Garissa County,Kenya	PLoS Negl Trop Dis	9(3):e0003548	2015	doi:10.1371/journal.pntd.0003548	English	Journal article
155	Memish	Elevated Antibodies against Rift Valley Fever Virus among Humans with Exposure to Ruminants in Saudi Arabia	Am. J. Trop. Med. Hyg	92(4), pp. 739–743	2015	10.4269/ajtmh.14-0575	English	Journal article
156	Ochieng	Seroprevalence of Infections with Dengue, Rift Valley Fever and Chikungunya Viruses in Kenya, 2007	PLOS ONE	10(7):e0132645.	2015	doi:10.1371/journal.pone.0132645	English	Journal article
157	Byomi	SOME ASSOCIATED RISK FACTORS WITH THE OCCURRENCE OF RIFT VALLEY FEVER IN ANIMALS AND MAN IN CERTAIN LOCALITIES OF NILE DELTA, EGYPT	Assiut Vet. Med. J	61(144):10-17	2015		English	Journal article
158	Muiruri	Cross-sectional survey of Rift Valley fever virus exposure in Bodhei village located in a transitional coastal forest habitat in Lamu county, Kenya	Am J Trop Med Hyg	92(2):394-400	2015	10.4269/ajtmh.14-0440	English	Journal article
159	Abdallah	A survey of rift valley fever and associated risk factors among the one-humped camel (Camelus dromedaries) in Sudan	Irish Veterinary Journal	69:1-6	2016	10.1186/s13620-016-0065-6	English	Journal article
160	Baudin	Association of Rift Valley fever virus infection with miscarriage in Sudanese women: a cross-sectional study.	Lancet Glob Health.	4(11):e864-e871	2016	10.1016/s2214-109x(16)30176-0	English	Journal article
161	Bisimwa	Molecular detection of arboviruses in Aedes mosquitoes collected from Kyela district, Tanzania	Revue de Médecine Vétérinaire	167(5-6)	2016		English	Journal article
162	Blomstrom	Seroprevalence of Rift Valley fever virus in sheep and goats in Zambezia, Mozambique	Infect Ecol Epidemiol	6:31343	2016	10.3402/iee.v6.31343	English	Journal article
163	Bosworth	Serologic evidence of exposure to Rift Valley fever virus detected in Tunisia	New Microbes New Infect	9:1-7	2016	10.1016/j.nmni.2015.10.010	English	Journal article
164	Boushab	Severe Human Illness Caused by Rift Valley Fever Virus in Mauritania, 2015	Open Forum Infect Dis	3(4):ofw200	2016	10.1093/ofid/ofw200	English	Journal article
165	Dellagi	Serological Evidence of Contrasted Exposure to Arboviral Infections between Islands of the Union of Comoros (IndianOcean)	PLoS Negl Trop Dis.	10(12)	2016	DOI:10.1371/journal.pntd.0004840	English	Journal article
166	Capobianco Dondona	Rift Valley Fever Virus among Wild Ruminants, Etosha National Park, Namibia, 2011	Emerg Infect Dis.	22(1):128-130	2016	10.3201/eid2201.150725	English	Journal article
167	de St. Maurice	Rift Valley Fever Response — Kabale District, Uganda, March 2016	MMWR	Vol. 65/No. 43, 1200-1201	2016	10.15585/mmwr.mm6543a5	English	Journal article
168	Enkhtsetseg	Seroconversion to Causes of Febrile Illness in Mongolian Peacekeepers Deployed to South Sudan.	Am J Trop Med Hyg	95(6):1469-1471	2016	10.4269/ajtmh.16-0174	English	Journal article
169	Fu	Import of Rift Valley fever to China: a potential new threat?	VIROLOGICA SINICA	31(5): 454-456	2016	DOI: 10.1007/s12250-016-3876-4	English	Journal article
170	Fafetine	Rift Valley Fever Outbreak in Livestock, Mozambique, 2014	Emerg Infect Dis	22(12):2165-2167	2016	10.3201/eid2212.160310	English	Journal article
171	Gudo	Serological evidence of rift valley fever virus among acute febrile patients in Southern Mozambique during and after the 2013 heavy rainfall and flooding:implication for the management of febrile illness	Virology Journal	13(96)	2016	10.1186/s12985-016-0542-2	English	Journal article
172	Gudo	Seroepidemiologic Screening for Zoonotic Viral Infections, Maputo, Mozambique	Emerg Infect Dis.	22(5):915-917	2016	10.32032/eid2205.151002	English	Journal article
173	Sow	Widespread Rift Valley Fever Emergence in Senegal in 2013–2014	Open Forum Infect Dis.	3(3):ofw149	2016	10.1093/ofid/ofw149	English	Journal article
174	García-Bocanegra	Absence of Rift Valley fever virus in domestic and wild ruminants from Spain	Vet Rec	179(2):48	2016	10.1136/vr.103696	English	Journal article
175	Muianga	Serological and molecular investigation of dengue, chikungunya and rift valey fever in febrile and non-febrile patients from northern Mozambique during Dengue outbreak, 2014	Poster presentation: 17th International Congress on Infectious Diseases / International Journal of Infectious Diseases 45S (2016) 1–477	??? 45S : 1–477	2016	http://dx.doi.org/10.1016/j.ijid.2016.02.43	English	abstract
176	Kim	Surveillance of Rift Valley Fever Virus in Mosquito Vectors of the Republic of Korea	Vector Borne Zoonotic Dis.	Volume 16, Number 2, 131-135	2016	10.1089/vbz.2015.1843	English	Journal article
177	Liu	Rift Valley fever virus imported into China from Angola	Lancet Infect Dis	16(11):1226	2016	10.1016/s1473-3099(16)30401-7.	English	Correspondence
178	Pachka	Rift Valley fever vector diversity and impact of meteorological and environmental factors on Culex pipiens dynamics in the Okavango Delta, Botswana	Parasites & Vectors	9:434	2016	10.1186/s13071-016-1712-1	English	Journal article
179	O'Hearn	Serosurveillance of viral pathogens circulating in West Africa	Virol J.	13(1):163	2016	10.1186/s12985-016-0621-4.	English	Journal article
180	Olive	Integrated Analysis of Environment, Cattle and Human Serological Data: Risks and Mechanisms of Transmission of Rift Valley Fever in Madagascar.	PLoS Negl Trop Dis	10(7): e0004827.	2016	doi:10.1371/ journal.pntd.0004827	English	Journal article
181	Maquart	Phylogeographic Reconstructions of a Rift Valley Fever Virus Strain Reveals Transboundary Animal Movements from Eastern Continental Africa to the Union of the Comoros	Transbound Emerg Dis	63(2):e281-285.	2016	10.1111/tbed.12267.	English	Journal article
182	Metras	The Epidemiology of Rift Valley Fever in Mayotte: Insights and Perspectives from 11 Years of Data	PLoS Negl Trop Dis.	10(6)	2016	10.1371/journal.pntd.0004783	English	Journal article
183	Nakoune	Rift Valley Fever Virus Circulating among Ruminants, Mosquitoes and Humans in the Central African Republic	PLoS Negl Trop Dis	10(10):e0005082	2016	10.1371/journal.pntd.0005082	English	Journal article
184	Kabwama	Risk factors for hematemesis in Hoima and Buliisa Districts, Western Uganda, September-October 2015	Pan African Medical Journal.	28:215	2017	10.11604/pamj.2017.28.215.12395	English	Journal article
185	Umunhoza	Seroprevalence of Rift Valley fever in cattle along the Akagera–Nyabarongo rivers, Rwanda	Journal of the South African Veterinary Association	88(0):e1-e5	2017	10.4102/jsava.v88i0.1379	English	Journal article
186	Magona	A retrospective sero-epidemiological study on Rift Valley fever in cattle in Uganda between 1997 to 2009	Bulletin of Animal Health and Production in Africa	65:405-412	2017		English	Journal article
187	Bett	Effects of flood irrigation on the risk of selected zoonotic pathogens in an arid and semi-arid area in the eastern Kenya.	PLoS One.	12(5)	2017	10.1371/journal.pone.0172626	English	Journal article
188	Bob	Detection of the Northeastern African Rift Valley Fever Virus Lineage During the 2015 Outbreak in Mauritania	Open Forum Infect Dis.	4(2):ofx087	2017	10.1093/ofid/ofx087	English	Journal article
189	Grossi-Soyster	Rift Valley Fever Seroprevalence in Coastal Kenya	Am. J. Trop. Med. Hyg.	97(1): 115-120	2017	doi:10.4269/ajtmh.17-0104	English	Journal article
190	Cook	The sero-epidemiology of Rift Valley fever in people in the Lake Victoria Basin of western Kenya	PLoS Negl Trop Dis.	11(7)	2017	http://dx.doi.org/10.17638/datacat.liverpool.ac.uk	English	Journal article
191	Sang	Effects of Irrigation and Rainfall on the Population Dynamics of Rift Valley Fever and Other Arbovirus Mosquito Vectors in the Epidemic-Prone Tana River County, Kenya	Journal of Medical Entomology	54(2):460–470	2017	10.1093/jme/tjw206	English	Journal article
192	Fèvre	An integrated study of human and animal infectious disease in the Lake Victoria crescent small-holder crop-livestock production system, Kenya	BMC Infect Dis.	17:457	2017	DOI 10.1186/s12879-017-2559-6	English	Journal article
193	Fakour	The first positive serological study on rift valley fever in ruminants of Iran	J Vector Borne Dis	54(4):348-352	2017	10.4103/0972-9062.225840	English	Journal article
194	Gür	The first serological evidence for Rift Valley feverinfection in the camel, goitered gazelle and Anatolian waterbuffaloes in Turkey	Trop Anim Health Prod	49:1531-1535	2017	10.1007/s11250-017-1359-8	English	Journal article
195	Gadia	Identification of pathogens for differential diagnosis of fever with jaundice in the Central African Republic: a retrospective assessment, 2008–2010	BMC Infect Dis.	17:735	2017	10.1186/s12879-017-2840-8	English	Journal article
196	Hassine	Emerging vector-borne diseases in dromedaries in Tunisia: West Nile, bluetongue, epizootic haemorrhagic disease and Rift Valley fever	Onderstepoort J Vet Res	84(1), a1316	2017	10.4102/ojvr.v84i1.1316	English	Journal article
197	Mohamed	Investigation of hemorrhagic fever viruses inside wild populations of ticks: One of the pioneer studies in Saudi Arabia	Asian Pacific Journal of Tropical Disease	7(5):299-233	2017	https://doi.org/10.12980/apjtd.7.2017D6-371	English	Journal article
198	Liu	The first imported case of Rift Valley fever in China reveals a genetic reassortment of different viral lineages	Emerging Microbes & Infections	e4	2017	10.1038/emi.2016.136;	English	Journal article
199	Kanoute	Epidemiology of brucellosis, Q Fever and Rift Valley Fever at the human and livestock interface in northern Cote d'Ivoire	Acta Trop	165:66-75	2017	10.1016/j.actatropica.2016.02.012	English	Journal article
200	Mbanzulu	Mosquito-borne viruse scirculating in Kinshasa, Democratic Republic of theCongo	Int J Infect Dis	57: 32-37	2017	http://dx.doi.org/10.1016/j.ijid.2017.01.016	English	Journal article
201	Rissman	Evidence for enzootic circulation of Rift Valley fever virus among livestock in Cameroon	Acta Trop.	172:7-13	2017	http://dx.doi.org/10.1016/j.actatropica.2017.04.001	English	Journal article
202	Rissman	Serological and genomic evidence of Rift Valley fever virus during inter-epidemic periods in Mauritania	Epidemiol. Infect.	145, 1058–1068	2017	doi:10.1017/S0950268816003022	English	Journal article
203	Maganga	Serological Evidence for the Circulation of Rift Valley Fever Virus in Domestic Small Ruminants in Southern Gabon	Vector Borne Zoonotic Dis.	17(6):443-446	2017	10.1089/vbz.2016.2065	English	Journal article
204	Olive	Reconstruction of Rift Valley fever transmission dynamics in Madagascar: estimation of force of infection from seroprevalence surveys using Bayesian modelling	Scientific Reports	7:39870	2017	DOI: 10.1038/srep39870	English	Journal article
205	Mroz	Seroprevalence of Rift Valley fever virus in livestock during inter-epidemic period in Egypt, 2014/15	BMC Vet Res	13	2017	10.1186/s12917-017-0993-8.	English	Journal article
206	Mroz	Rift Valley fever virus infections in Egyptian cattle and their prevention	Transbound Emerg Dis.	64(6):2049-2058	2017	10.1111/tbed.12616	English	Journal article
207	Métras	Absence of Evidence of Rift Valley Fever Infection in Eulemur fulvus (Brown Lemur) in Mayotte During an Interepidemic Period	Vector Borne Zoonotic Dis	17(5):358-360	2017	10.1089/vbz.2016.2079	English	Journal article
208	Mdlulwa	Evaluating the impact of 2010 Rift Valley fever outbreaks on sheep numbers in three provinces of South Africa	African Journal of Agricultural Research	12(11):979–986	2017		English	Journal article
209	Moiane B	High seroprevalence of Rift Valley fever phlebovirus in domestic ruminants and African Buffaloes in Mozambique shows need for intensified surveillance	Infect Ecol Epidemiol	7(1):1416248	2017	10.1080/20008686.2017.1416248	English	Journal article
210	Nanyingi	Seroepidemiological Survey of Rift Valley Fever Virus in Ruminants in Garissa, Kenya.	Vector Borne Zoonotic Dis.	17(2):141-146.	2017	10.1089/vbz.2016.1988.	English	Journal article
211	Ahmed	Sero-prevalence and spatial distribution of Rift Valley fever infection among agropastoral and pastoral communities during Interepidemic period in the Serengeti ecosystem, northern Tanzania	BMC Infect Dis.	18:276-284	2018	https://doi.org/10.1186/s12879-018-3183-9	English	Journal article
212	Alhaji	Participatory survey of Rift Valley fever in nomadic pastoral communities of North-central Nigeria: The associated risk pathways and factors	PLoS Negl Trop Dis	12(10):e0006858	2018	10.1371/journal.pntd.0006858	English	Journal article
213	Bazanow	Preliminary serological investigation of Rift Valley fever in Poland	J Vector Borne Dis	55(4):324-326	2018	10.4103/0972-9062.256570	English	Journal article
214	Mahmoud	Rift Valley fever virus: a serological survey in Libyan ruminants	Open Veterinary Journal	8(2):204-207	2018	10.4314/ovj.v8i2.15	English	Journal article
215	van Vuren	Human Cases of Rift Valley Fever in South Africa, 2018	Vector Borne Zoonotic Dis.	Volume 18, Number 12, pages 713- 715	2018	DOI: 10.1089/vbz.2018.2357	English	Journal article
216	Subudhi	Seroprevalence of Rift Valley Fever Virus Antibodies in Cattle in Mali, 2005–2014	Am. J. Trop. Med. Hyg.	98(3):872-874	2018	doi:10.4269/ajtmh.17-0841	English	Journal article
217	Saasa	Expression of a Recombinant Nucleocapsid Protein of Rift Valley Fever Virus in Vero Cells as an Immunofluorescence Antigen and Its Use for Serosurveillance in Traditional Cattle Herds in Zambia.	Vector Borne Zoonotic Dis.	18(5):273-277	2018	10.1089/vbz.2017.2186	English	Journal article
218	Sadeuh-Mba	Serological evidence of rift valley fever Phlebovirus and Crimean-Congo hemorrhagic fever orthonairovirus infections among pygmies in the eastr egion of Cameroon	Virology Journal	15:63	2018	https://doi.org/10.1186/s12985-018-0977-8	English	Journal article
219	Matiko	Serological evidence of inter-epizootic/inter-epidemic circulation of Rift Valley fever virus in domestic cattle in Kyela and Morogoro, Tanzania.	PLoS Negl Trop Dis	12(11):e0006931	2018	10.1371/journal.pntd.0006931	English	Journal article
220	Budasha	Rift Valley fever seroprevalence and abortion frequency among livestock of Kisoro district, South Western Uganda (2016): a prerequisite for zoonotic infection	BMC Vet Res	14(1):271	2018	10.1186/s12917-018-1596-8	English	Journal article
221	El Bahgy	Epidemiological surveillance of bovine viral diarrhea and rift valley fever infections in camel	Veterinary World	11(9):1331-1337	2018	10.14202/vetworld.2018.1331-1337	English	Journal article
222	Guillebaud	Study on causes of fever in primary health care center uncovers pathogens of public health concern in Madagascar	PLoS Negl Trop Dis	12(7)	2018	https://doi.org/10.1371/journal.pntd.0006642	English	Journal article
223	Georges	Seroprevalence and Virus Activity of Rift Valley Fever in Cattle in Eastern Region of Democratic Republic of the Congo	Hindawi Journal of Veterinary Medicine	4956378	2018	https://doi.org/10.1155/2018/4956378	English	Journal article
224	Jansen van Vuren	Human Cases of Rift Valley Fever in South Africa, 2018	Vector Borne Zoonotic Dis.	Volume 18, Number 12	2018	10.1089/vbz.2018.2357	English	Journal article
225	Jeffries	Diverse novel resident Wolbachia strains in Culicine mosquitoes from Madagascar	Scientific Reports	8	2018	10.1038/s41598-018-35658-z	English	Journal article
226	Sternberg Lewerin	Methodological aspects of serosurveillance in resource-poor settings.	Vet Rec Open	5(1):e000273.	2018	10.1136/vetreco-2017-000273	English	Journal article
227	Mbotha	Inter-epidemic Rift Valley fever virus seroconversions in an irrigation scheme in Bura, south-east Kenya	Transbound Emerg Dis	65:e55-e62	2018	DOI: 10.1111/tbed.12674	English	Journal article
228	Simpson	Prevalence of Selected Zoonotic Diseases and Risk Factors at a Human-Wildlife-Livestock Interface in Mpumalanga Province, South Africa	Vector Borne Zoonotic Dis	18(6):303-310	2018	10.1089/vbz.2017.2158	English	Journal article
229	Makiala-Mandanda	Identification of Dengue and Chikungunya Cases Among Suspected Cases of Yellow Fever in the Democratic Republic of the Congo	Vector Borne Zoonotic Dis.	18(7):364-370	2018	10.1089/vbz.2017.2176.	English	Journal article
230	Molini	Antibodies against Schmallenberg virus detected in cattle in the Otjozondjupa region, Namibia	Journal of the South African Veterinary Association	89(0)	2018	10.4102/jsava.v89i0.1666	English	Journal article
231	Nyakarahuka	Prevalence and risk factors of Rift Valley fever in humans and animals from Kabale district in Southwestern Uganda, 2016	PLoS Negl Trop Dis.	12(5):e0006412	2018	https://doi.org/10.1371/journal.pntd.0006412	English	Journal article
232	Shayif	Epidemiological Study on Rift Valley. Fever Virus among Humans in Taiz Governorate (Yemen).	Am J Clin. Microbiol Antimicrob.	1(6)	2018		English	Journal article
233	Oyas	Enhanced surveillance for Rift Valley Fever in livestock during El Niño rains and threat of RVF outbreak, Kenya, 2015-2016	PLoS Negl Trop Dis.	12(4):e0006353	2018	10.1371/journal.pntd.0006353	English	Journal article
234	Ndiaye	Arboviruses isolated from the Barkedji mosquito-based surveillance system, 2012-2013	BMC Infect Dis.	18:642	2018	https://doi.org/10.1186/s12879-018-3538-2	English	Journal article
235	Almasri	Hajj abattoirs in Makkah: risk of zoonotic infections among occupational workers	Vet Med Sci	5(3):428-434	2019	10.1002/vms3.169	English	Journal article
236	van den Bergh	High seroconversion rate to Rift Valley fever virus in cattle and goats in far northern KwaZulu-Natal, South Africa, in the absence of reported outbreaks	PLoS Negl Trop Dis.	13(5):e0007296	2019	https://doi.org/10.1371/journal. pntd.0007296	English	Journal article
237	van Vuren	Rift Valley Fever Reemergence after 7 Years of Quiescence, South Africa, May 2018	Emerg Infect Dis	Vol 25, NO 2, Pages 338-341	2019	https://doi.org/10.3201/eid2502.181289	English	Journal article
238	Adamou Hama	Séroprévalence de la fièvre de la vallée du Rift chez les ruminants domestiques dans la région de Tahoua/Niger.	Int J Biol Chem Sci.	13:3023-3031	2019	N/A	French	Journal article
239	Tshilenge	Seroprevalence of Rift Valley fever virus in cattle in the Democratic Republic of the Congo.	Tropical Animal Health and Production	51(3):537-543	2019	10.1007/s11250-018-1721-5	English	Journal article
240	Tshilenge	Rift Valley fever virus in small ruminants in the Democratic Republic of the Congo	Onderstepoort J Vet Res	86(1)	2019	10.4102/ojvr.v86i1.1737	English	Journal article
241	Tong	Tracking Rift Valley fever: From Mali to Europe and other countries, 2016	Euro Surveill	24(8)	2019	10.2807/1560-7917.es.2019.24.8.1800213.	English	Journal article
242	Bett	Association between Rift Valley fever virus seroprevalences in livestock and humans and their respective intra-cluster correlation coefficients, Tana River County, Kenya	Epidemiol. Infect.	147	2019	10.1017/S0950268818003242	English	Journal article
243	Salekwa	Circulation of Rift Valley Fever Virus Antibody in Cattle during Inter-Epizootic/EpidemicPeriods in Selected Regions of Tanzania	Am. J. Trop. Med. Hyg.	101(2):459-466	2019	doi:10.4269/ajtmh.18-0798	English	Journal article
244	Clements	Chikungunya and O’nyong-nyong Viruses in Uganda: Implications for Diagnostics	Open Forum Infect Dis.	3;6(3):ofz001	2019	10.1093/ofid/ofz001	English	Journal article
245	Halawi	Seroprevalence of Rift Valley fever in cattle of smallholder farmers in Kwilu Province in the Democratic Republic of Congo	Trop Anim Health Prod.	51(8):2619-2627	2019	10.1007/s11250-019-01978-z	English	Journal article
246	Lagare	First occurrence of Rift Valley fever outbreak in Niger, 2016	Veterinary Medicine and Science	5, pp. 70–78	2019	10.1002/vms3.135	English	Journal article
247	Shoemaker	First Laboratory-Confirmed Outbreak of Human and Animal Rift Valley Fever Virus in Uganda in 48 Years	Am J Trop Med Hyg.	100(3):659-671	2019	10.4269/ajtmh.18-0732	English	Journal article
248	Poueme	Seroprevalence and Associated Risk Factors of Rift Valley Fever in Domestic Small Ruminants in the North Region of Cameroon	Hindawi Veterinary Medicine International	2019:8149897	2019	https://doi.org/10.1155/2019/8149897	English	Journal article
249	Msimang	Rift Valley Fever Virus Exposure amongst Farmers, Farm Workers, and Veterinary Professionals in Central South Africa	Viruses	11(2).	2019	10.3390/v11020140	English	Journal article
250	Mohamed N	Prevalence and identification of arthropod-transmitted viruses in Kassala state, Eastern Sudan	Libyan Journal of Medicine	14(1).	2019	10.1080/19932820.2018.1564511	English	Journal article
251	Adesiyun	Sero-Epidemiological Study of Selected Zoonotic and Abortifacient Pathogens in Cattle at a Wildlife-Livestock Interface in South Africa	Vector Borne Zoonotic Dis.	20:258-267	2020	10.1089/vbz.2019.2519	English	Journal article
252	Lubisi	Seroprevalence of Rift valley fever in South African domestic and wild suids (1999–2016)	Transbound Emerg Dis.	67:811-821	2020	DOI: 10.1111/tbed.13402	English	Journal article
253	Alhaji	Seropositivity and associated intrinsic and extrinsic factors for Rift Valley fever virus occurrence in pastoral herds of Nigeria: a cross sectional survey	BMC Vet Res	16:1-10	2020	https://doi.org/10.1186/s12917-020-02455-8	English	Journal article
254	Van den Bergh	Neutralizing antibodies against Rift Valley fever virus in wild antelope in far northern KwaZulu-Natal, South Africa, indicate recent virus circulation	Transbound Emerg Dis.	67:1356-1363	2020	DOI: 10.1111/tbed.13479	English	Journal article
255	Adamu	Serosurvey on Sheep Unravel Circulation of Rift Valley Fever Virus in Nigeria	EcoHealth	N/A	2020	https://doi.org/10.1007/s10393-020-01490-zEcoHealth https://doi.org/10.1007/s10393-020-01490-z	English	Journal article
256	Youssouf	Rift Valley Fever Outbreak, Mayotte, France, 2018-2019	Emerg Infect Dis	26(4):769-772	2020	10.3201/eid2604.191147	English	Journal article
257	Tigoi	High risk for human exposure to Rift Valley fever virus in communities living along livestock movement routes: A cross-sectional survey in Kenya	PLoS Negl Trop Dis	14(2):e0007979	2020	10.1371/journal.pntd.0007979	English	Journal article
258	Sanderson	Silent Circulation of Rift Valley Fever in Humans, Botswana, 2013–2014	Emerg Infect Dis	Vol. 26, No. 10, 2453-2456	2020	https://doi.org/10.3201/eid2610.191837	English	Journal article
259	Bilgin	Investigation of Vector-Borne Viruses in Ticks, Mosquitos, and Ruminants in the Thrace District of Turkey	Vector Borne Zoonotic Dis	20(9):670-679	2020	10.1089/vbz.2019.2532	English	Journal article
260	Budodo	Serological evidence of exposure to Rift Valley, Dengue and Chikungunya Viruses among agropastoral communities in Manyara and Morogoro regions in Tanzania: A community survey.	PLoS Negl Trop Dis.	14(7):e0008061	2020	10.1371/journal.pntd.0008061	English	Journal article
261	Dieng	Mobile Laboratory Reveals the Circulation of DengueVirus Serotype I of Asian Origin in Medina Gounass(Guediawaye), Senegal	Diagnostics	10(408):1-10	2020	doi:10.3390/diagnostics10060408	English	Journal article
262	Durand	Rift Valley fever in northern Senegal: A modelling approach to analyse the processes underlying virus circulation recurrence	Plos Neglected Tropical Diseases.	14(6)	2020	10.1371/journal.pntd.0008009	English	Journal article
263	Dutuze	Identification of Bunyamwera and Possible Other Orthobunyavirus Infections and Disease in Cattle during a Rift Valley Fever Outbreak in Rwanda in 2018	Am J Trop Med Hyg	103(1):183-189	2020	10.4269/ajtmh.19-0596	English	Journal article
264	Shabana	Seroprevalence of some viral and bacterial zoonoses in domestic ruminants in Medina	Journal of Advanced Veterinary and Animal Research	7(1):42-50	2020	http://doi.org/10.5455/javar.2020.g391	English	Journal article
265	Hassan	Epidemiological Investigation of a Rift Valley Fever Outbreak in Humans and Livestock in Kenya, 2018	Am. J. Trop. Med. Hyg.	103(4)	2020	doi:10.4269/ajtmh.20-0387	English	Journal article
266	Suner	Seroprevalence of Mosquito-borne Viruses Among Residents from Different Cities of Nigeria	abstract	n/a	2020		English	abstract
267	Asebe	Seroprevalence of Rift Valley Fever and West Nile Fever in Cattle in Gambella Region, South West Ethiopia	Veterinary Medicine: Research and Reports	11:119-130	2020	http://doi.org/10.2147/VMRR.S278867	English	Journal article
268	Selmi	First serological evidence of the Rift Valley fever Phlebovirus in Tunisian camels	Acta Trop	207:105462	2020	10.1016/j.actatropica.2020.105462	English	Journal article
269	Ngoshe	Patterns of Rift Valley fever virus seropositivity in domestic ruminants in central South Africa four years after a large outbreak	Scientific Reports	10:5489	2020	https://doi.org/10.1038/s41598-020-62453-6	English	Journal article
270	Ndengu	Seroprevalence and associated risk factors of Rift Valley fever in cattle and selected wildlife species at the livestock/wildlife interface areas of Gonarezhou National Park, Zimbabwe.	Onderstepoort J Vet Res	87(1):e1-e7.	2020	10.4102/ojvr.v87i1.1731	English	Journal article
271	Ekong	RVFV Gray Data From Nigeria	N/A yet		N/A		English	not yet
